# Supplementary material for: Prognostic Values of Inflammatory Indexes and Clinical Factors in Patients with Epidermal Growth Factor Receptor Mutations in Lung Adenocarcinoma and Treated with Tyrosine Kinase Inhibitors
Source: MDPI journal article supplement (doi:10.3390/jpm12030404), 2022-03-05
Supplement: s1 [file s1]

## Supplementary Online Content

Chang B-S, Peng T-C, Wu Y-F, Hsieh Y-C and Huang C-H. Prognostic Values of Inflammatory Indexes and Clinical Factors in Patients with Epidermal Growth Factor Receptor Mutations in Lung Adenocarcinoma and Treated with Tyrosine Kinase Inhibitors. *Journal of Personalized Medicine*.

**Table S1.** Time-dependent receiver operating characteristic curve analysis for progression-free and overall survival.

**Figure S1.** Time-dependent receiver operating characteristic curves for determining the optimal cutoff value of preoperative systemic inflammatory markers for progression-free survival included lymphocyte-to-monocyte ratio (**A**), neutrophil-to-lymphocyte ratio (**B**), platelet-to-lymphocyte ratio (**C**), and systemic immune-inflammation index (**D**); overall survival included lymphocyte-to-monocyte ratio (**A**), neutrophil-to-lymphocyte ratio (**B**), platelet-to-lymphocyte ratio (**C**), and systemic immune-inflammation index (**D**).

**Figure S2.** Kaplan–Meier estimates of survival outcomes. Prediction of progression-free survival according to age (**A**), stage (**B**), EGFR-mutation type of deletion 19 vs. L858R (**C**), deletion 19 vs. others (**D**), and neutrophil-to-lymphocyte ratio (**E**). Prediction of overall survival according to age (**F**), EGFR-mutation type of deletion 19 vs. others (**G**), and lymphocyte-to-monocyte ratio (**H**).

**This supplementary material has been provided by the authors to give readers additional information about their work.**

**Table S1.** Time-dependent receiver operating characteristic curve analysis for progression-free and overall survival.

| Parameter                                                        | Progression-Free Survival |       |       |       | Overall Survival |       |       |       |
|------------------------------------------------------------------|---------------------------|-------|-------|-------|------------------|-------|-------|-------|
|                                                                  | LMR                       | NLR   | PLR   | SII   | LMR              | NLR   | PLR   | SII   |
| AUC                                                              | 0.547                     | 0.643 | 0.550 | 0.562 | 0.873            | 0.579 | 0.793 | 0.617 |
| Optimal sensitivity (%)                                          | 0.271                     | 0.694 | 0.261 | 0.821 | 0.702            | 0.824 | 0.641 | 0.758 |
| Optimal specificity (%)                                          | 0.816                     | 0.599 | 0.913 | 0.374 | 0.696            | 0.361 | 0.844 | 0.496 |
| Cutoff value at maximizes the sum of sensitivity and specificity | 2.1                       | 3.0   | 170.2 | 567.7 | 2.9              | 3.2   | 190.4 | 753.8 |

AUC: area under curve; LMR: lymphocyte-to-monocyte ratio; NLR: neutrophil-to-lymphocyte ratio; PLR: platelet-to-lymphocyte ratio; SII: systemic immune-inflammation index.

## Progression-Free Survival

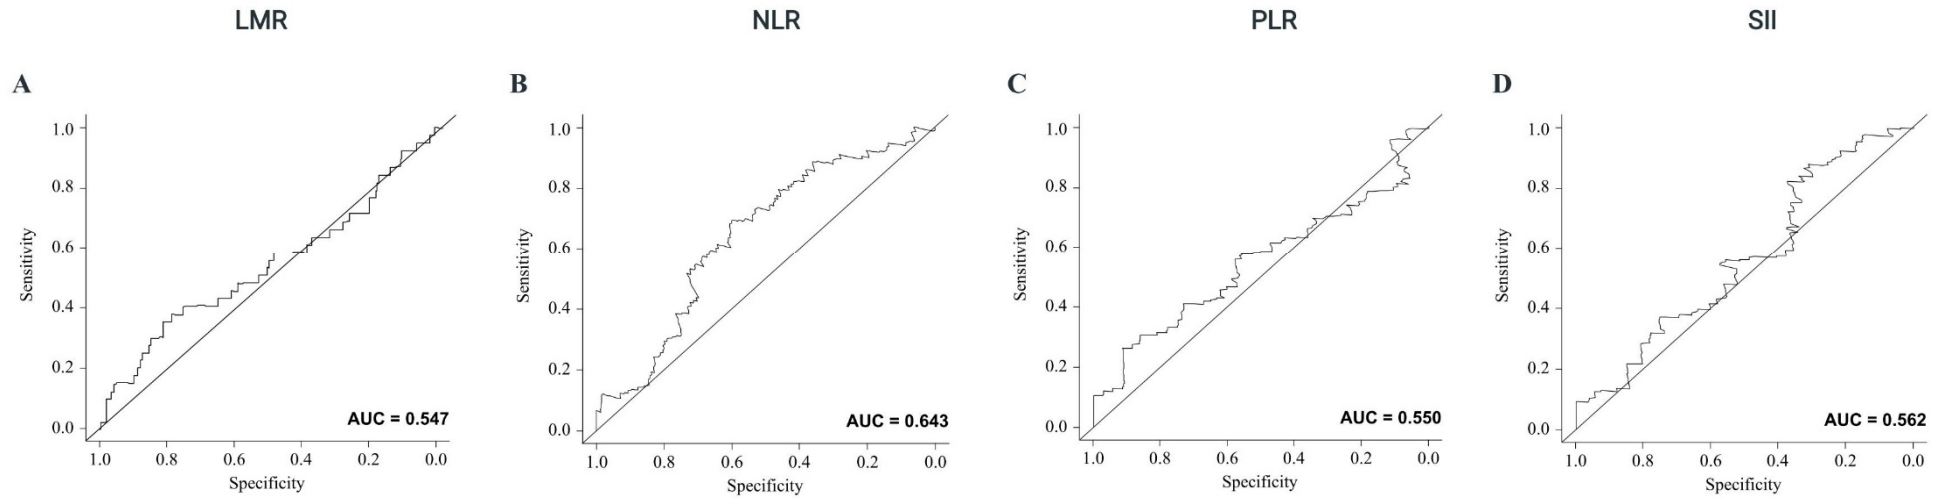

## Overall Survival

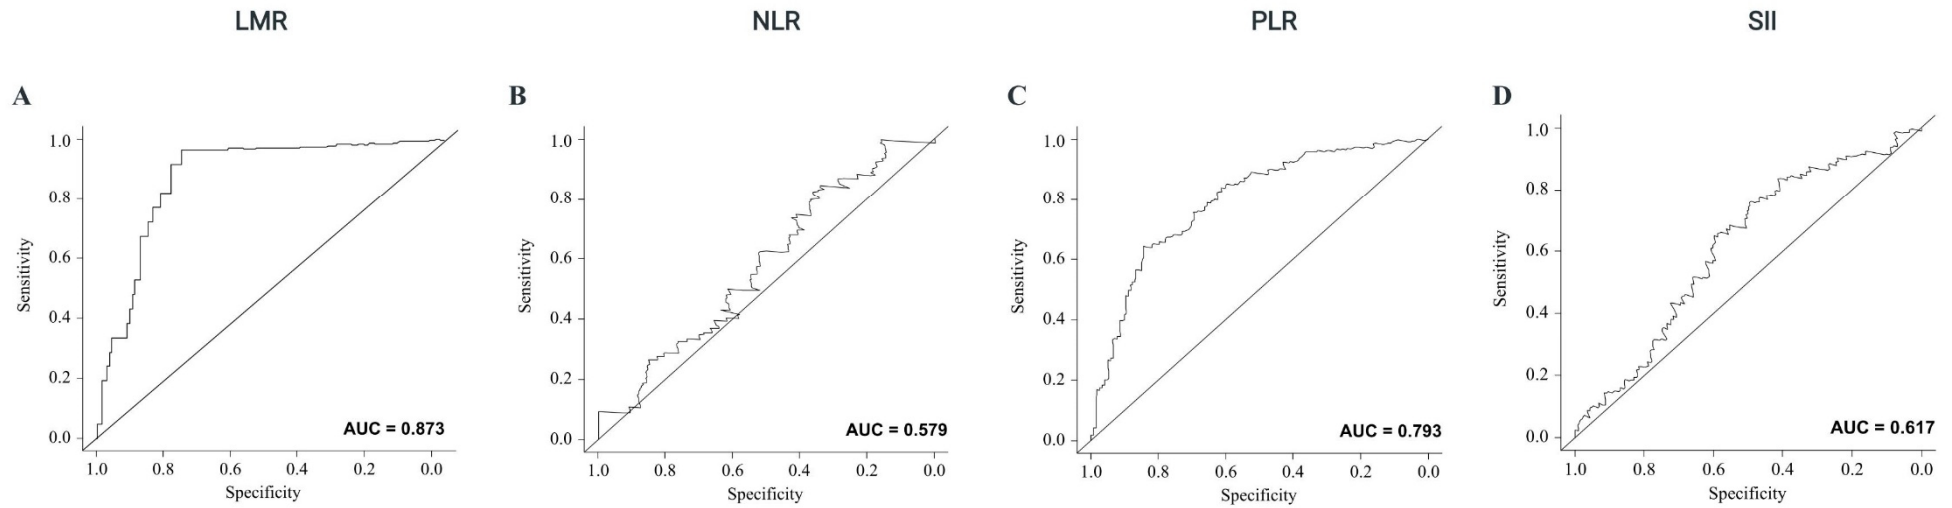

**Figure S1.** Time-dependent receiver operating characteristic curves for determining the optimal cutoff value of preoperative systemic inflammatory markers for progression-free survival included lymphocyte-to-monocyte ratio (A), neutrophil-to-lymphocyte ratio (B), platelet-to-lymphocyte ratio (C), and systemic immune-inflammation index (D); overall survival included lymphocyte-to-monocyte ratio (A), neutrophil-to-lymphocyte ratio (B), platelet-to-lymphocyte ratio (C), and systemic immune-inflammation index (D).

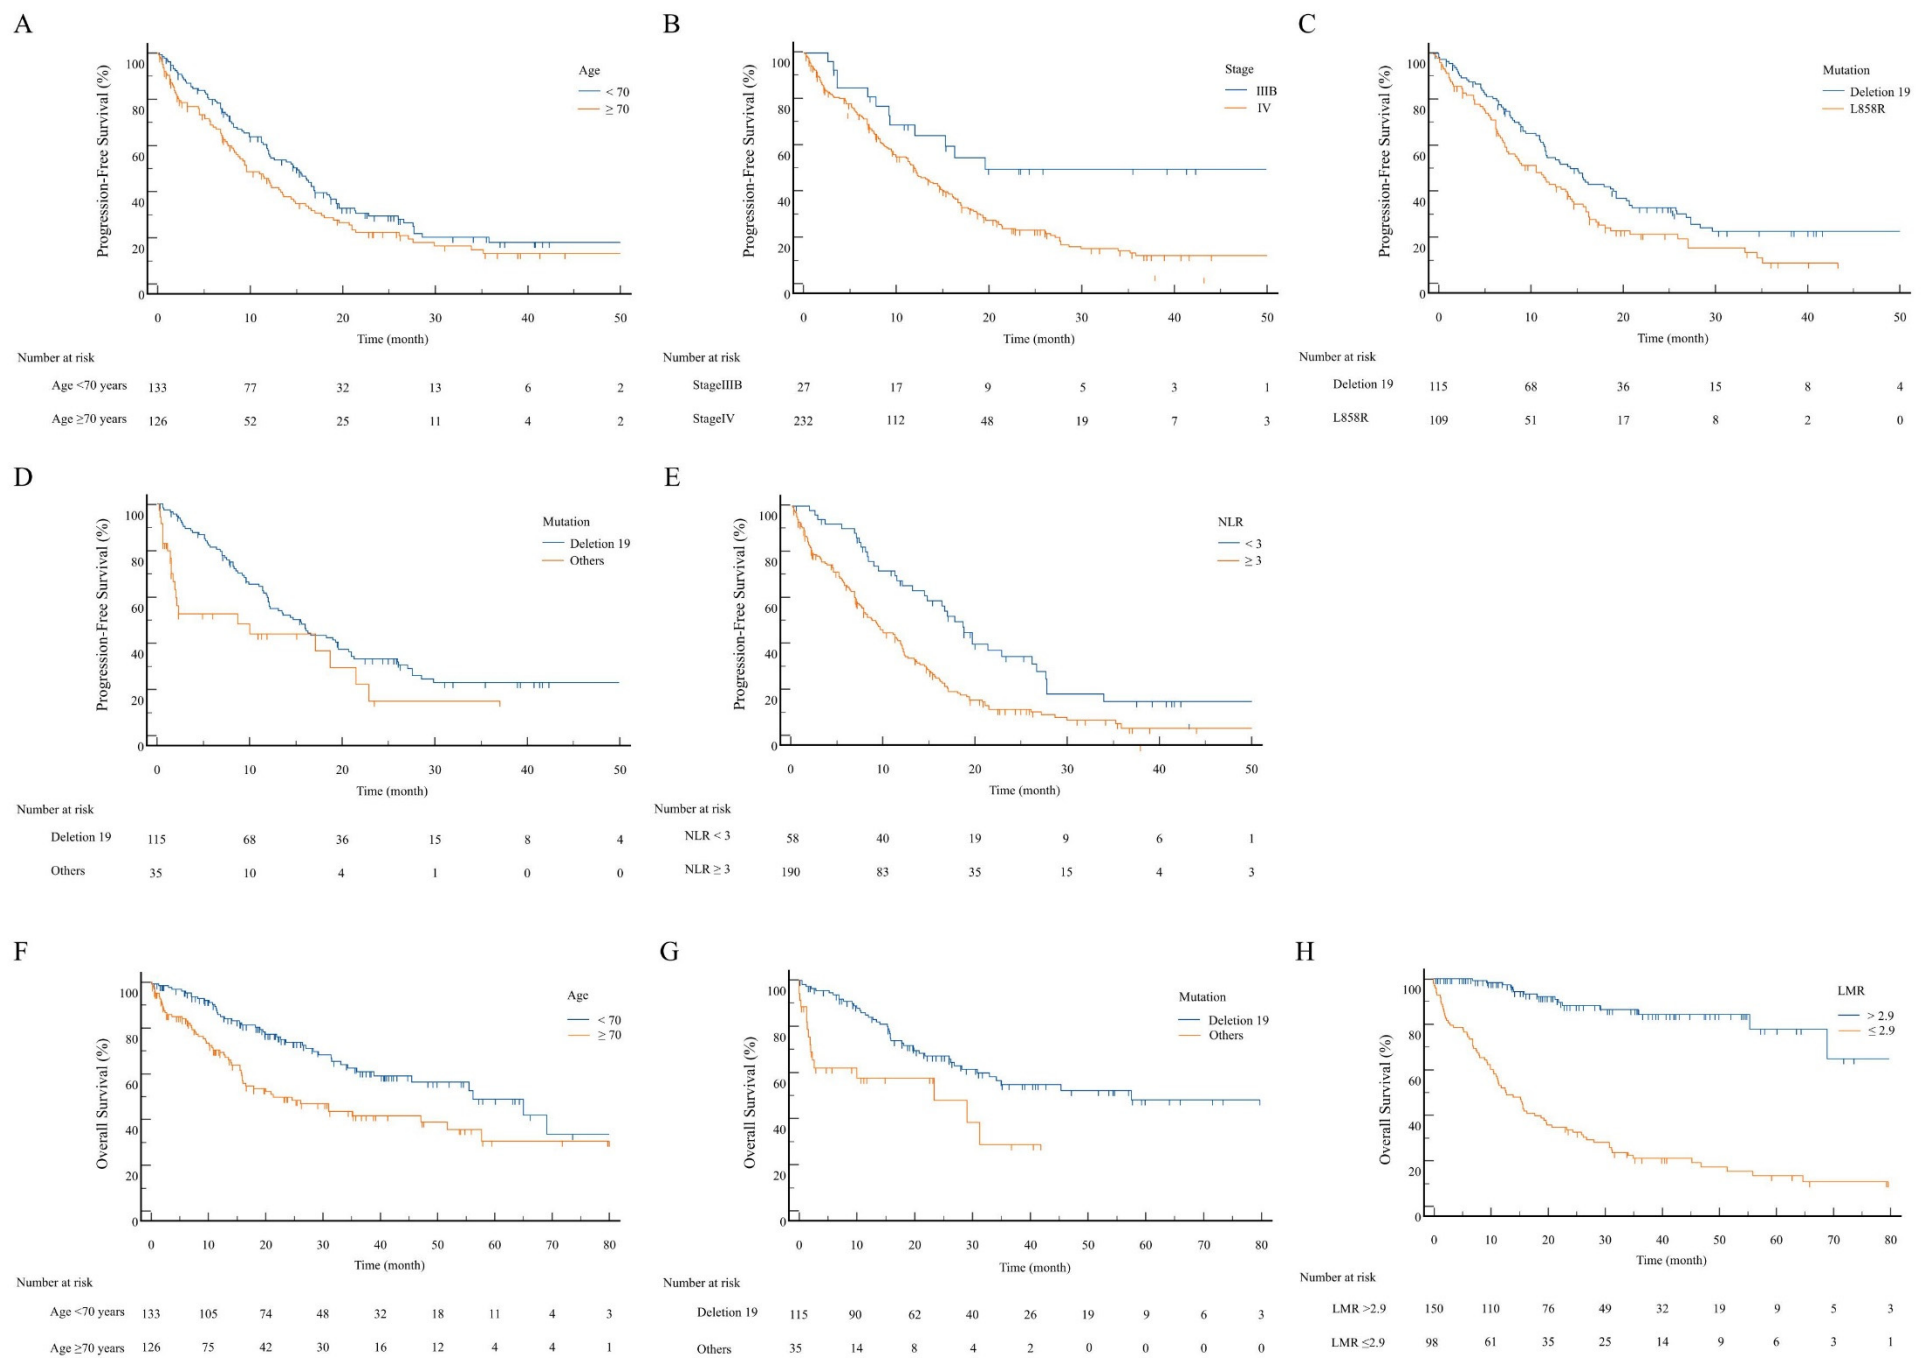

**Figure S2.** Kaplan–Meier estimates of survival outcomes. Prediction of progression-free survival according to age (A), stage (B), EGFR-mutation type of deletion 19 vs. L858R (C), deletion 19 vs. others (D), and neutrophil-to-lymphocyte ratio (E). Prediction of overall survival according to age (F), EGFR-mutation type of deletion 19 vs. others (G), and lymphocyte-to-monocyte ratio (H).
